# Supplementary material for: The PAK1-Stat3 Signaling Pathway Activates IL-6 Gene Transcription and Human Breast Cancer Stem Cell Formation
Source: PubMed Central journal article supplement (PMC6826853; doi:10.3390/cancers11101527), 2019-10-10
Supplement: cancers-11-01527-s001.pdf [file cancers-11-01527-s001.pdf]

## Supplementary Materials

**Table S1.** Specific primer sequence of Real-time RT-PCR.

| Genes                    | Primers                                                                          |
|--------------------------|----------------------------------------------------------------------------------|
| IL-6                     | Forward: 5'- AGACAGCCACTCACCTCTTCAG<br>Reverse: 5'- TTCTGCCAGTGCCTCTTTGCTG       |
| ChIP and Re-ChIP<br>IL-6 | Forward: 5'-GTTGTGTCTTGCGATGCTAAAG<br>Reverse: 5'-GCTTCTCTTTTCGTTCCCGTG          |
| CD44                     | Forward: 5'-AGAAGGTGTGGGCAGAAGAA-3'<br>Reverse: 5'-AAATGCACCATTTCTGAGA-3'        |
| Nanog                    | Forward: 5'-ATGCCTCACACGGAGACTGT-3'<br>Reverse: 5'-AAGTGGGTTGTTTGCCTTTG-3'       |
| C-myc                    | Forward: 5'-AATGAAAAGGCCCCCAAGGTAGTTATCC-3'<br>Reverse : 5'-AGCAAACCCGGAGGAGT-3' |
| Sox2                     | Forward : 5'-TTGCTGCCTCTTTAAGACTAGGA-3'<br>Reverse : 5'-CTGGGGCTCAAACCTCTCTC-3'  |
| Oct4                     | Forward: 5'-AGCAAACCCGGAGGAGT-3'-3'<br>Reverse: 5'-CCACATCGGCCTGTGTATATC-3'      |
| $\beta$ -actin           | Forward: 5'-TGTTACCAACTGGGACGACA-3'<br>Reverse : 5'-GGGGTGTGAAGGTCTCAA-3'        |

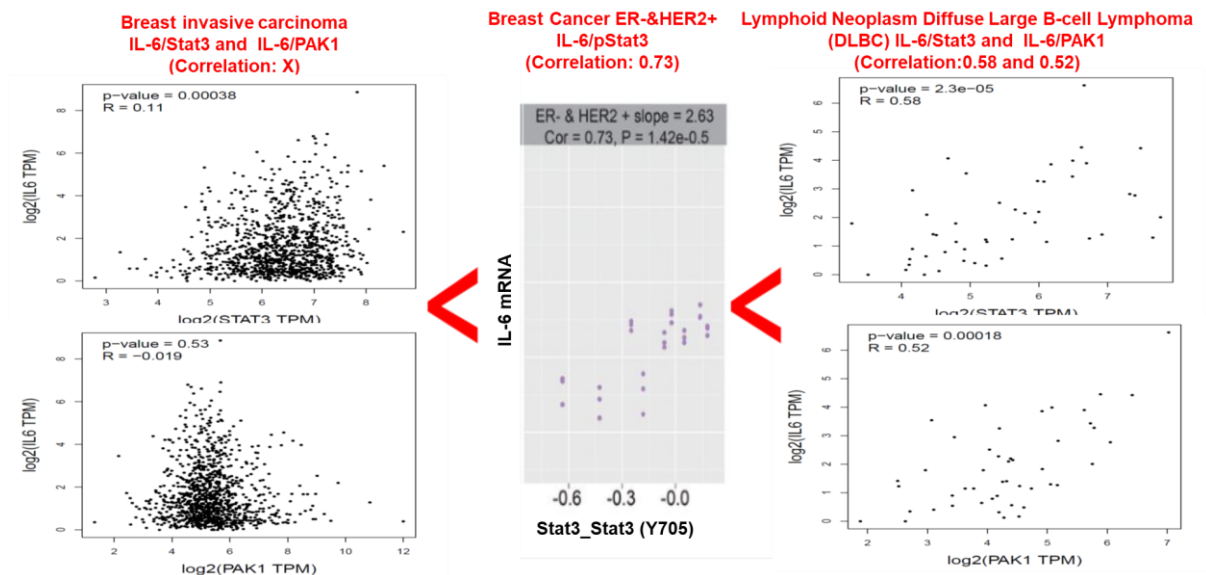

**Figure S1.** Correlation of Stat3/IL-6 and PAK1/IL6 in breast invasive carcinoma, breast cancer ER-&HER2+, and lymphoid neoplasm diffuse large B-cell lymphoma. Breast invasive carcinoma showed no correlation of IL-6/Stat3 and IL-6/PAK1. Breast cancer ER-&HER2+ showed that correlation of IL-6/pStat3 is 0.73. Lymphoid neoplasm diffuse large B-cell lymphoma showed that: correlation of IL-6/Stat3 and IL-6/PAK1 were 0.58 and 0.52.

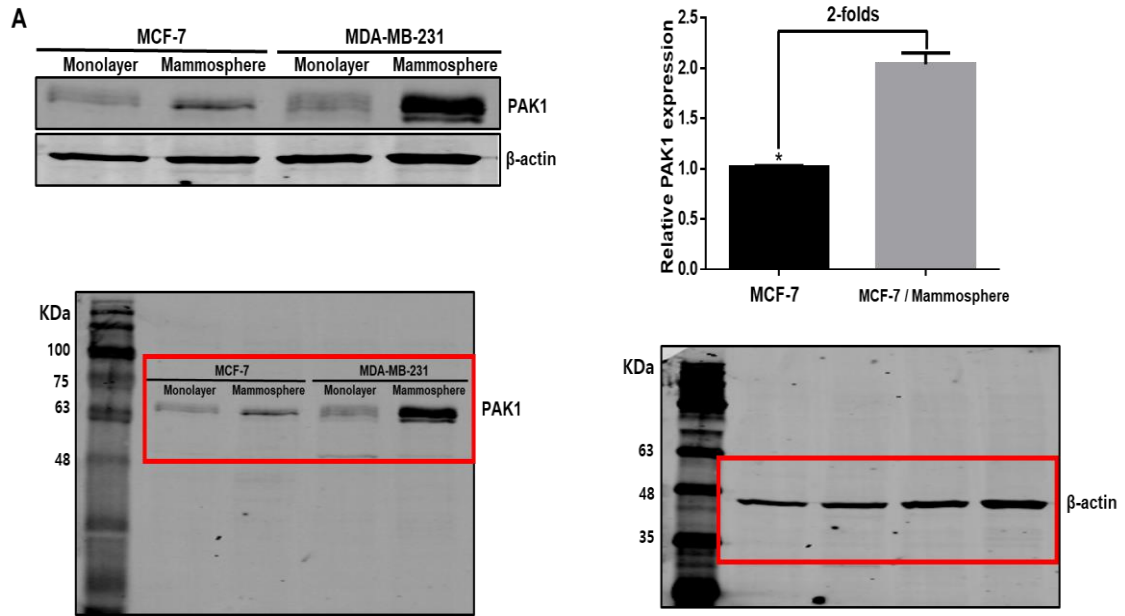

Figure 1A

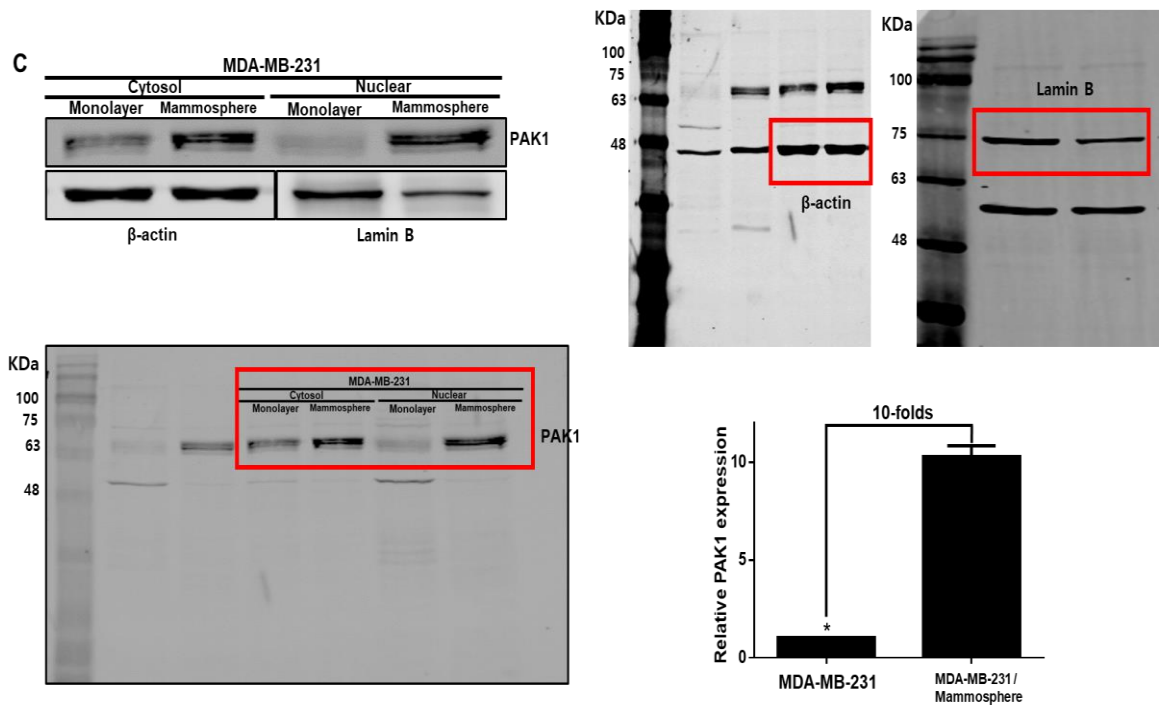

Figure 1C

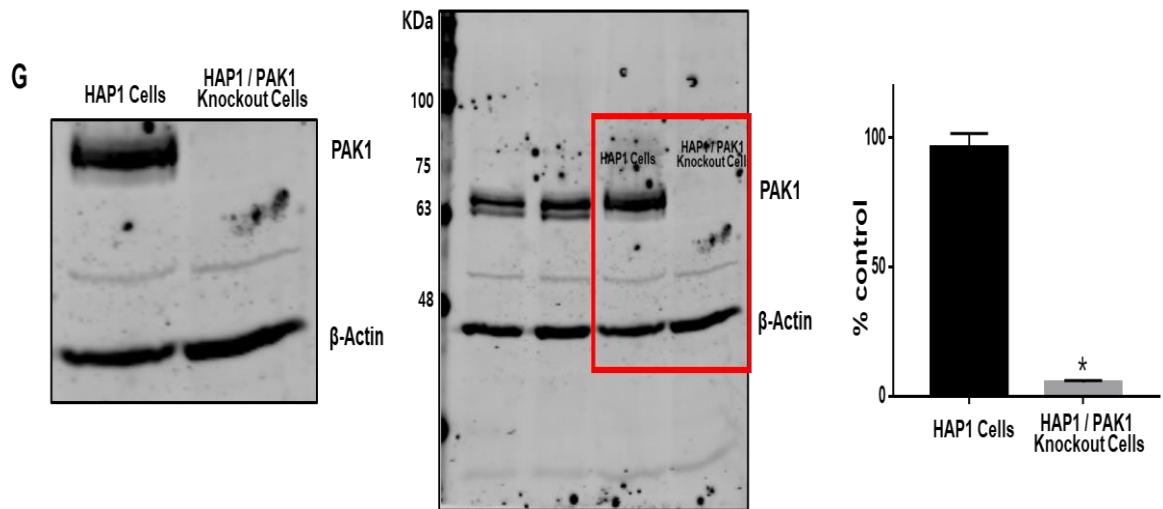

Figure 2G

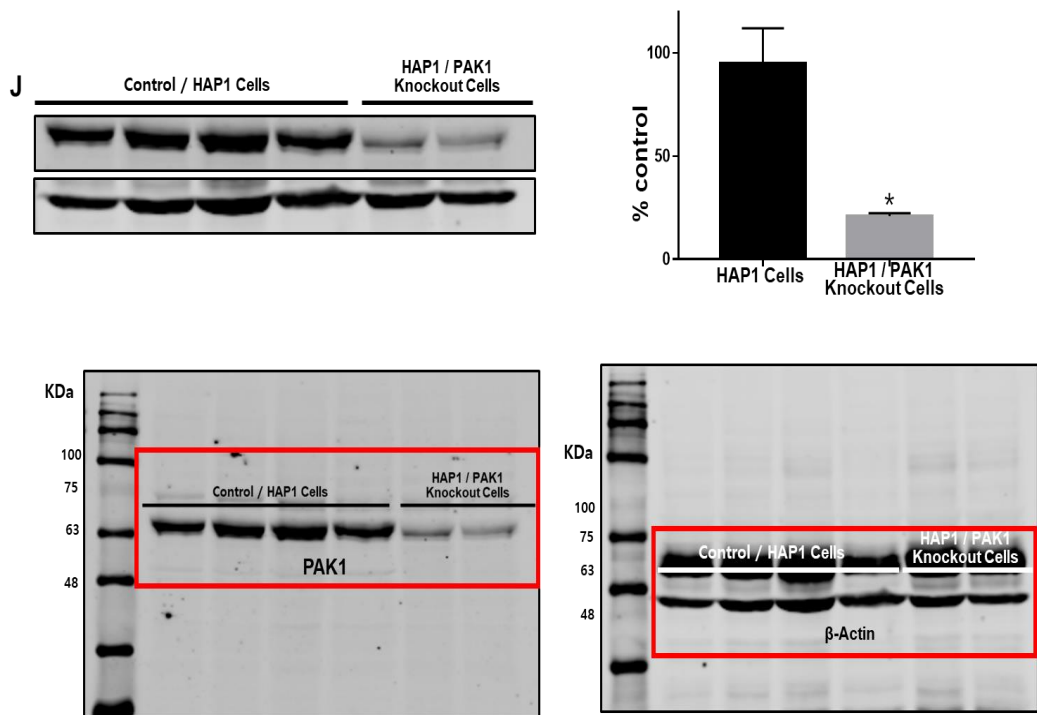

Figure 2J

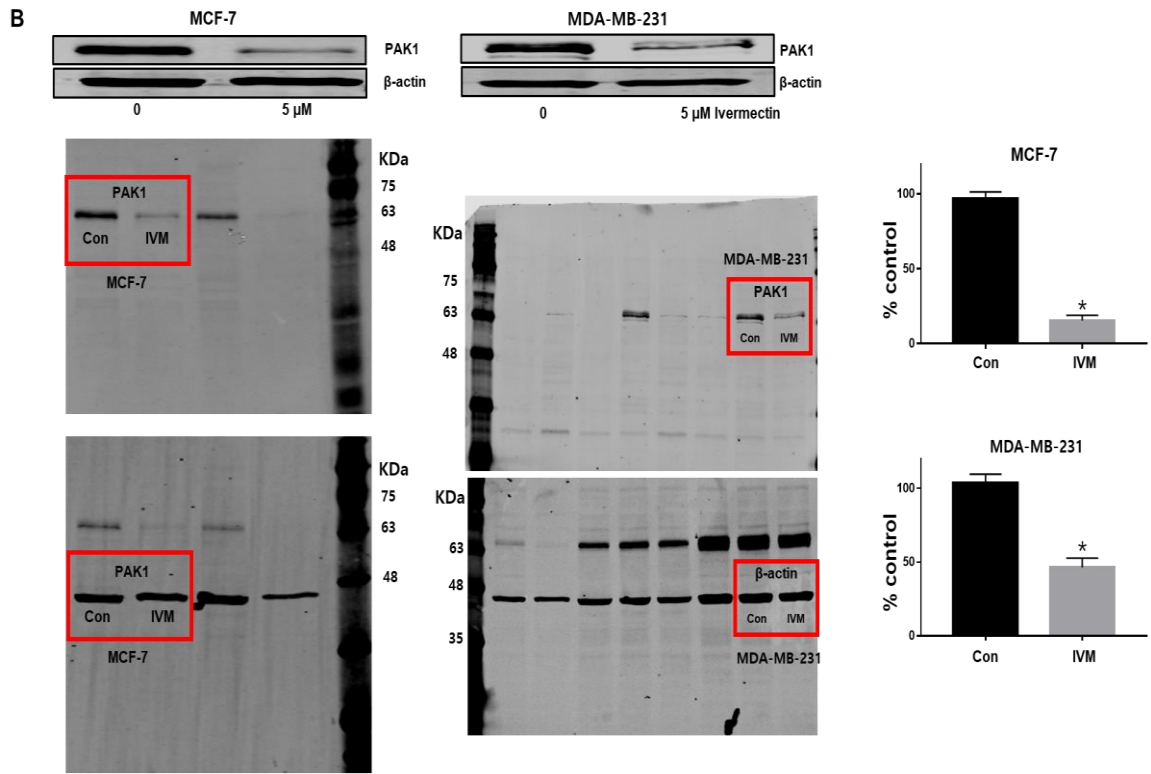

Figure 3B

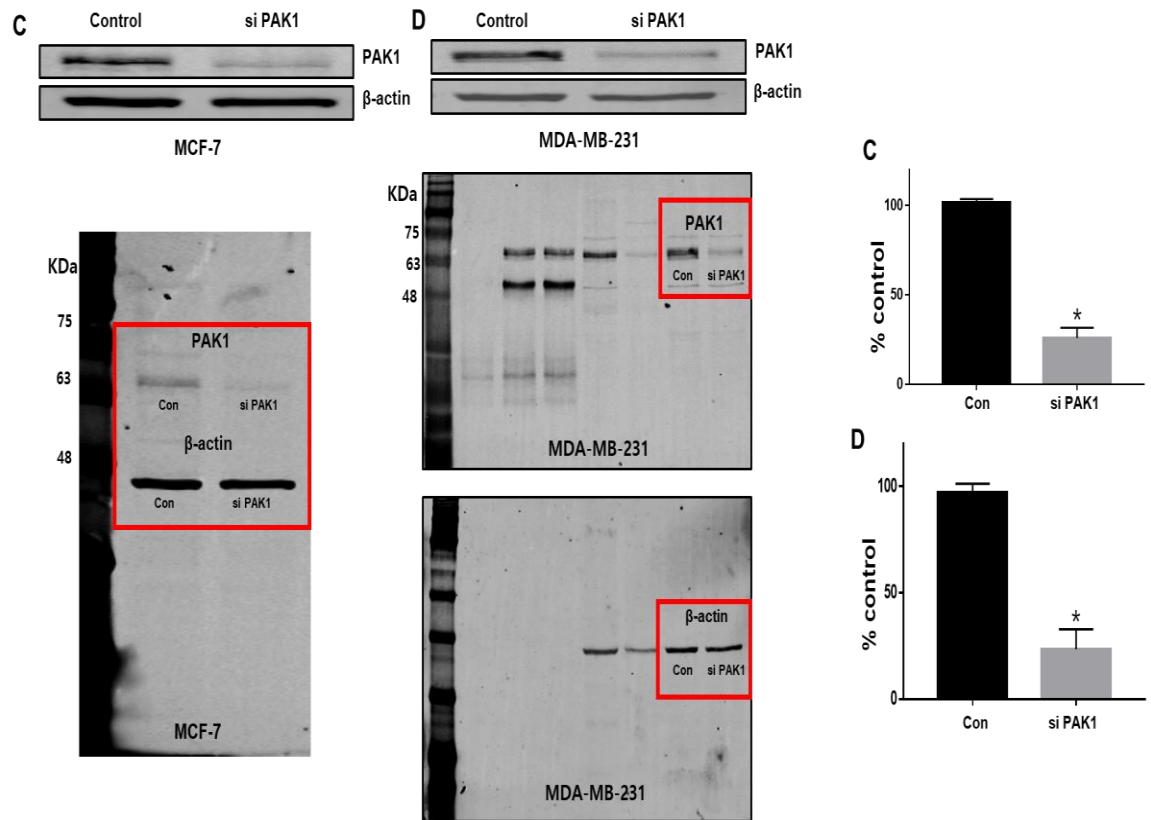

Figure 3CD

**B**

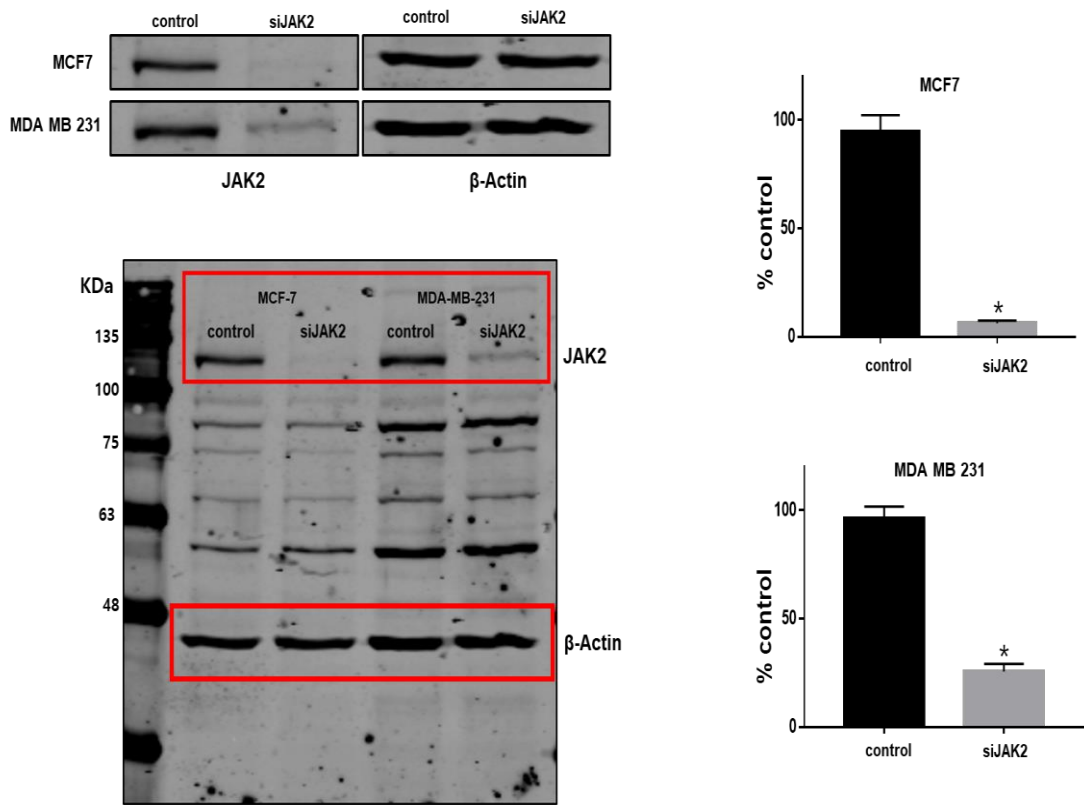

Figure 4B

**E**

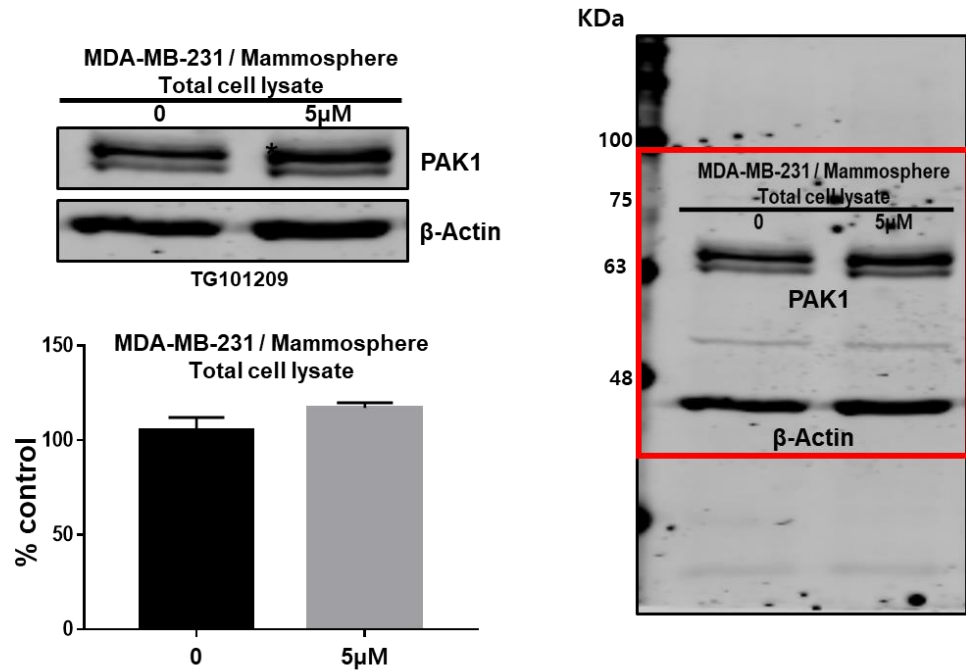

Figure 4E

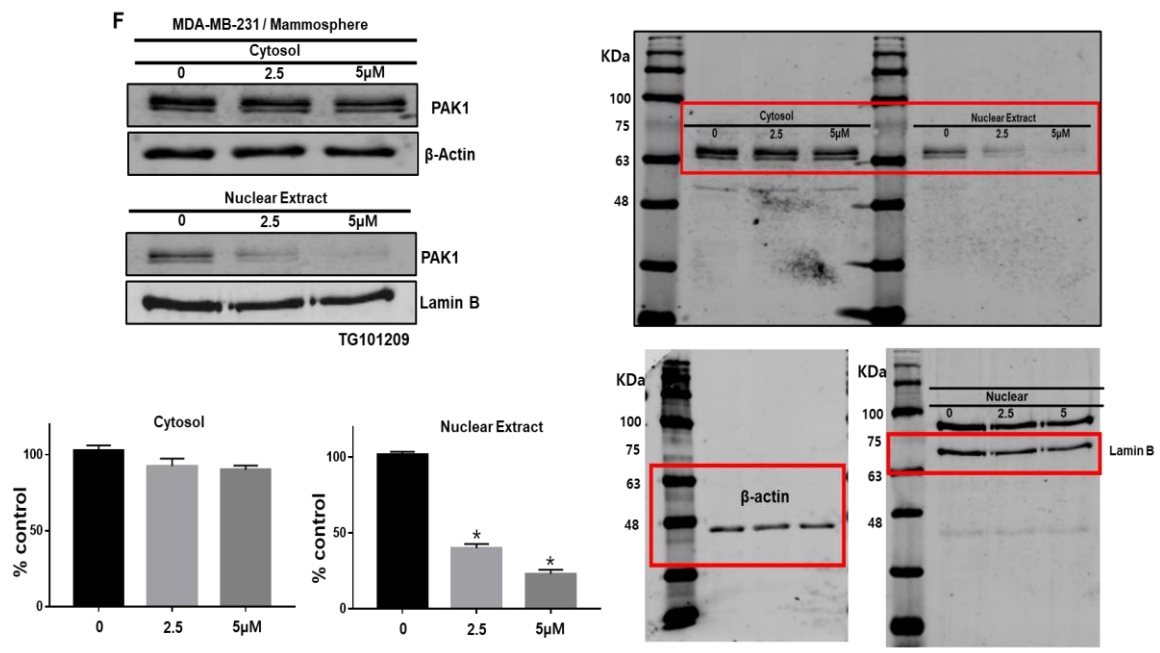

Figure 4F

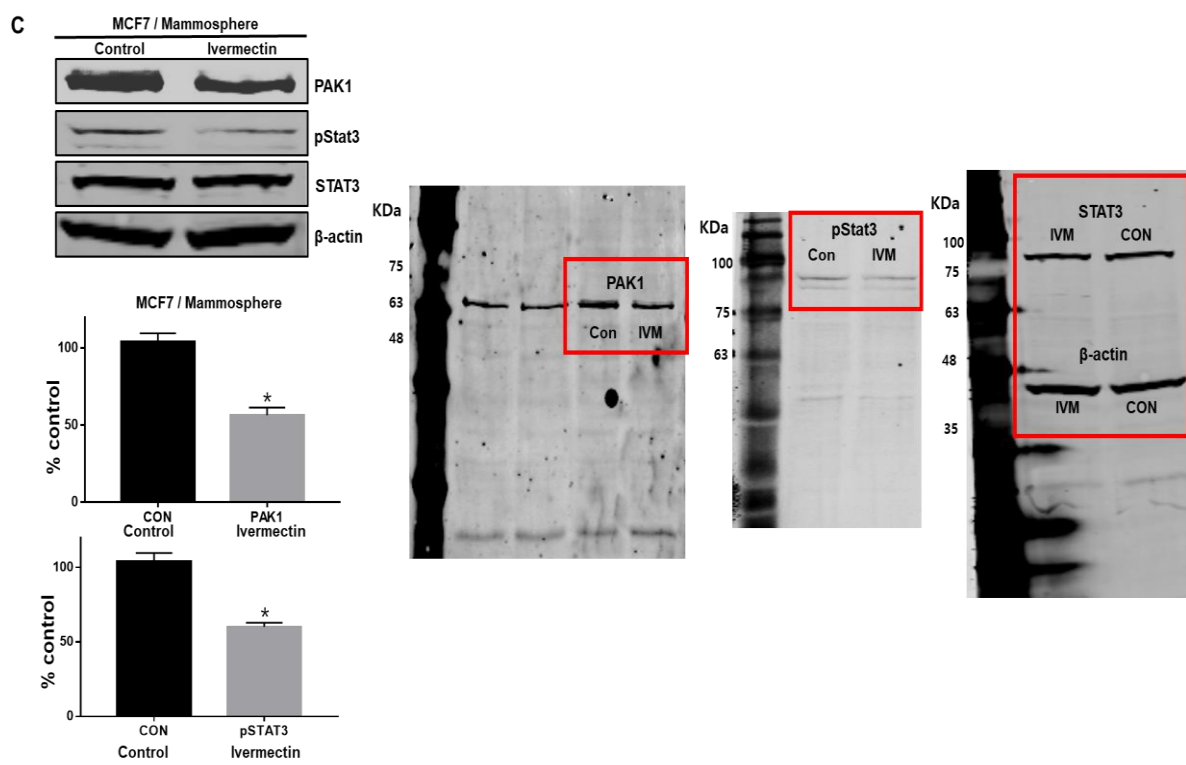

Figure 5C

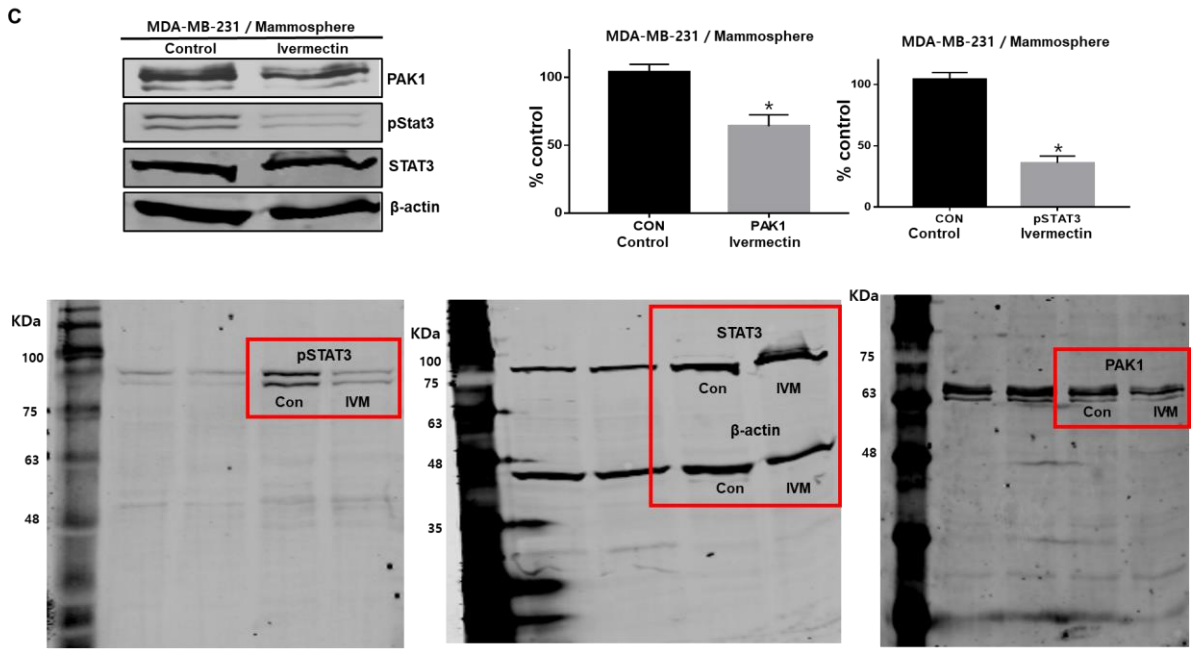

Figure 5C

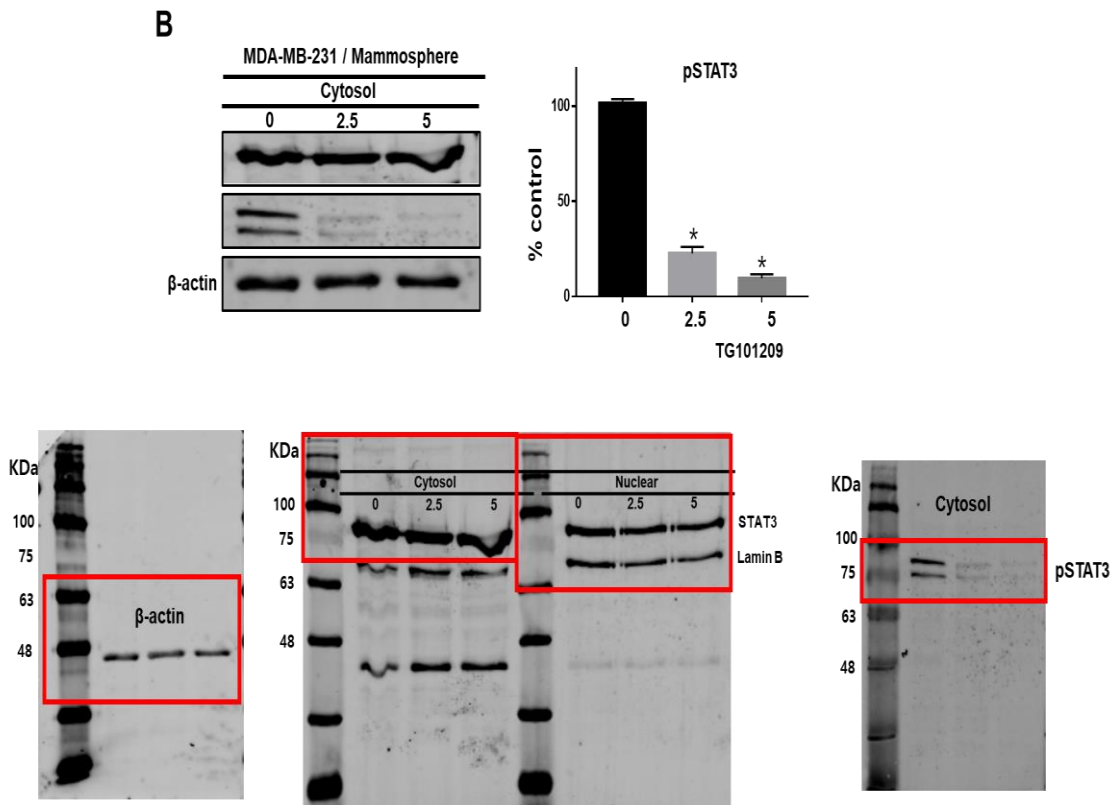

Figure 6B

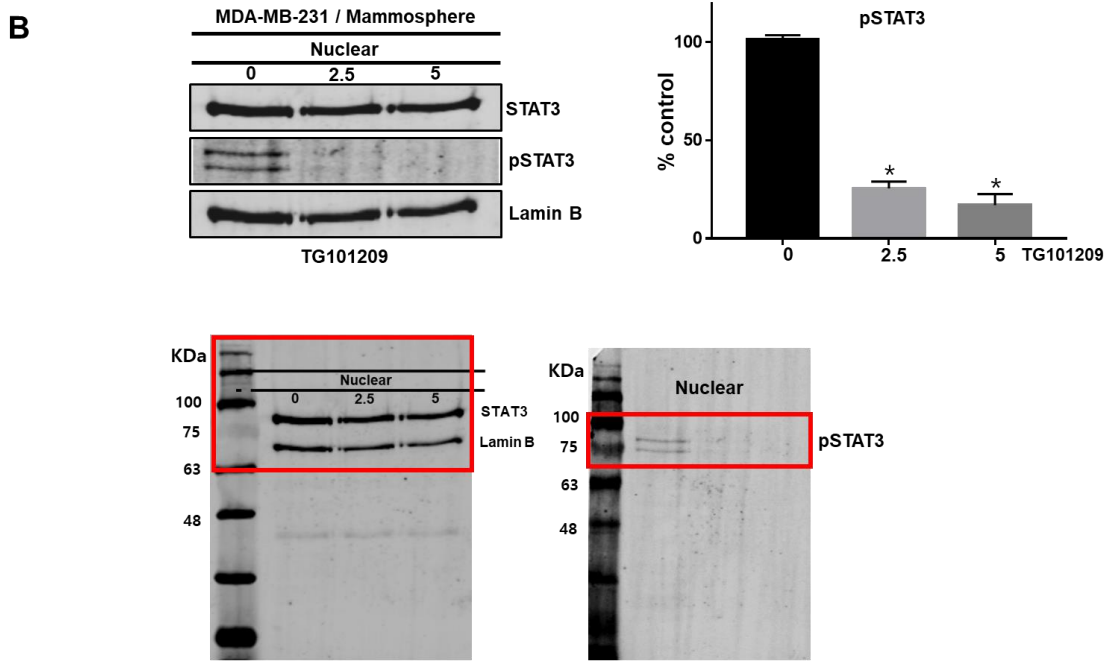

**Figure 6B**

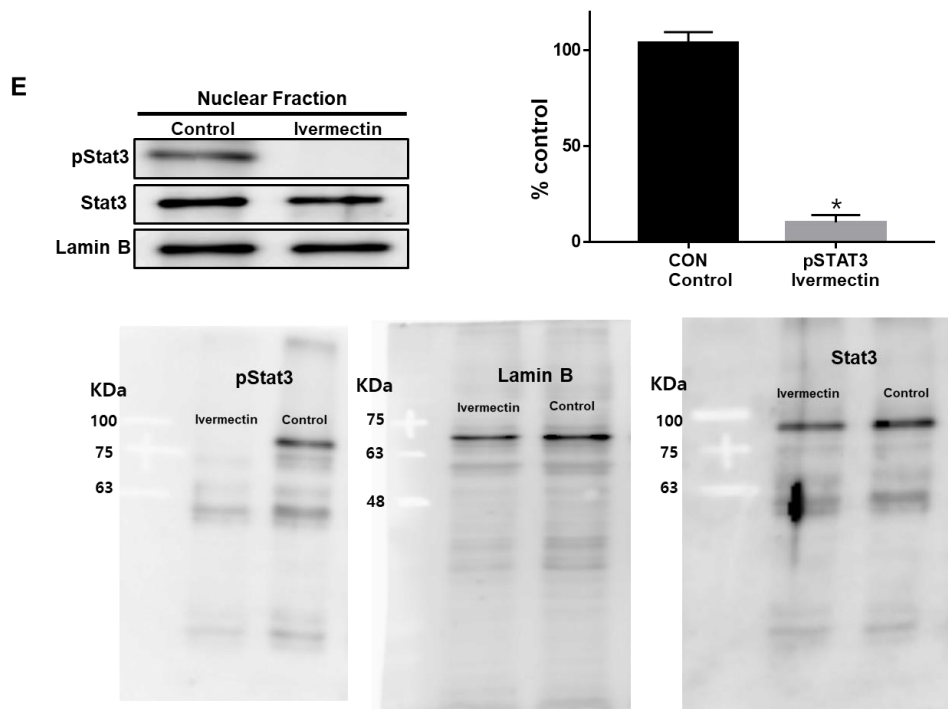

**Figure 7E**

**Figure S2.** Western blot figures including densitometry readings/intensity ratio of each band, the whole blot, and all the bands with all molecular weight markers on the Western blot.
